# Supplementary material
Source: publisher site journal article supplement (https://www.dovepress.com/article/419491)
Supplement: Supplementary file 1 [file get_supplementary_file.php]

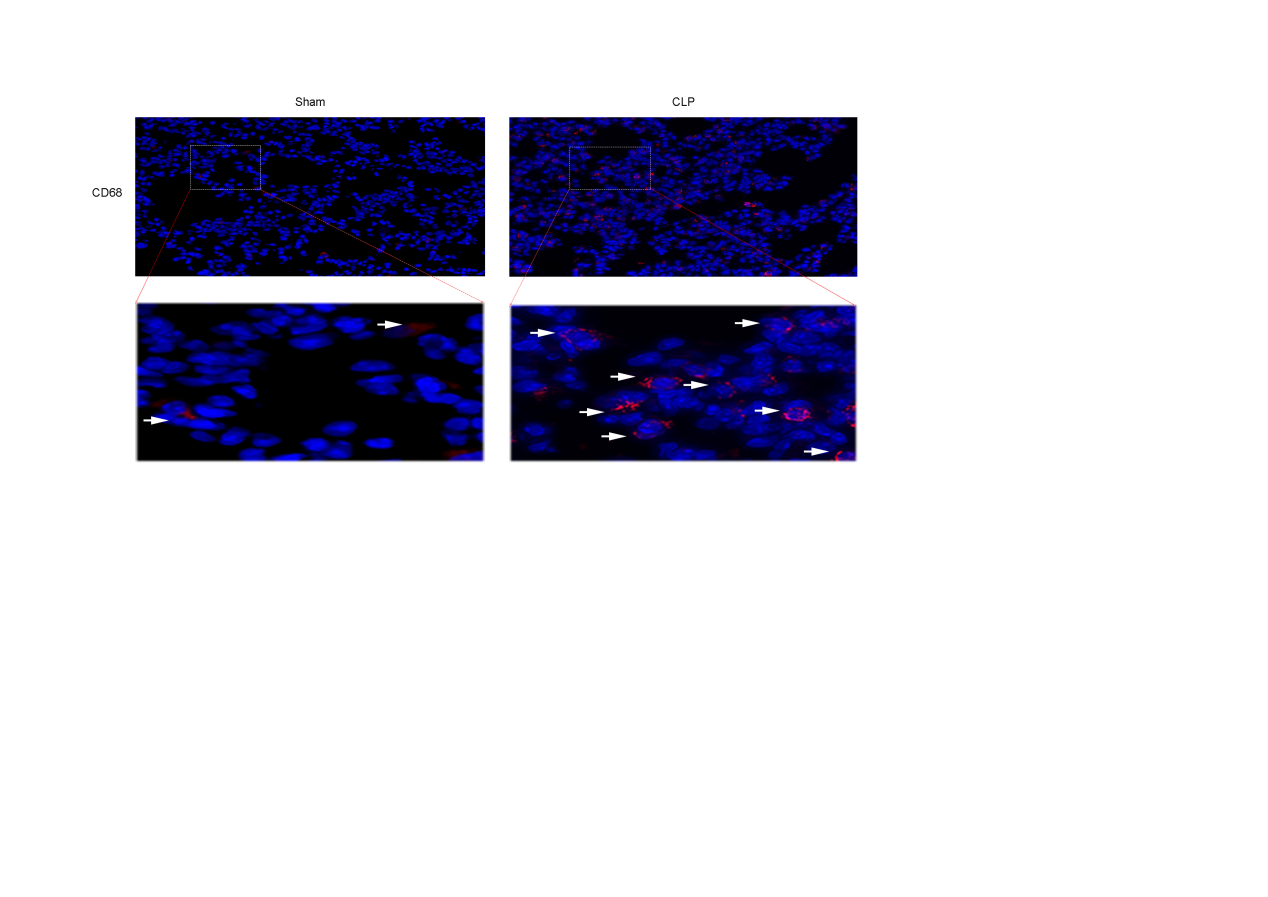


Figure S1. After sectioning, the number of macrophages in lung tissue was detected by anti-CD68 antibody staining (n=6 per group). CD68 positive macrophages were normalized to dapi positive cells.


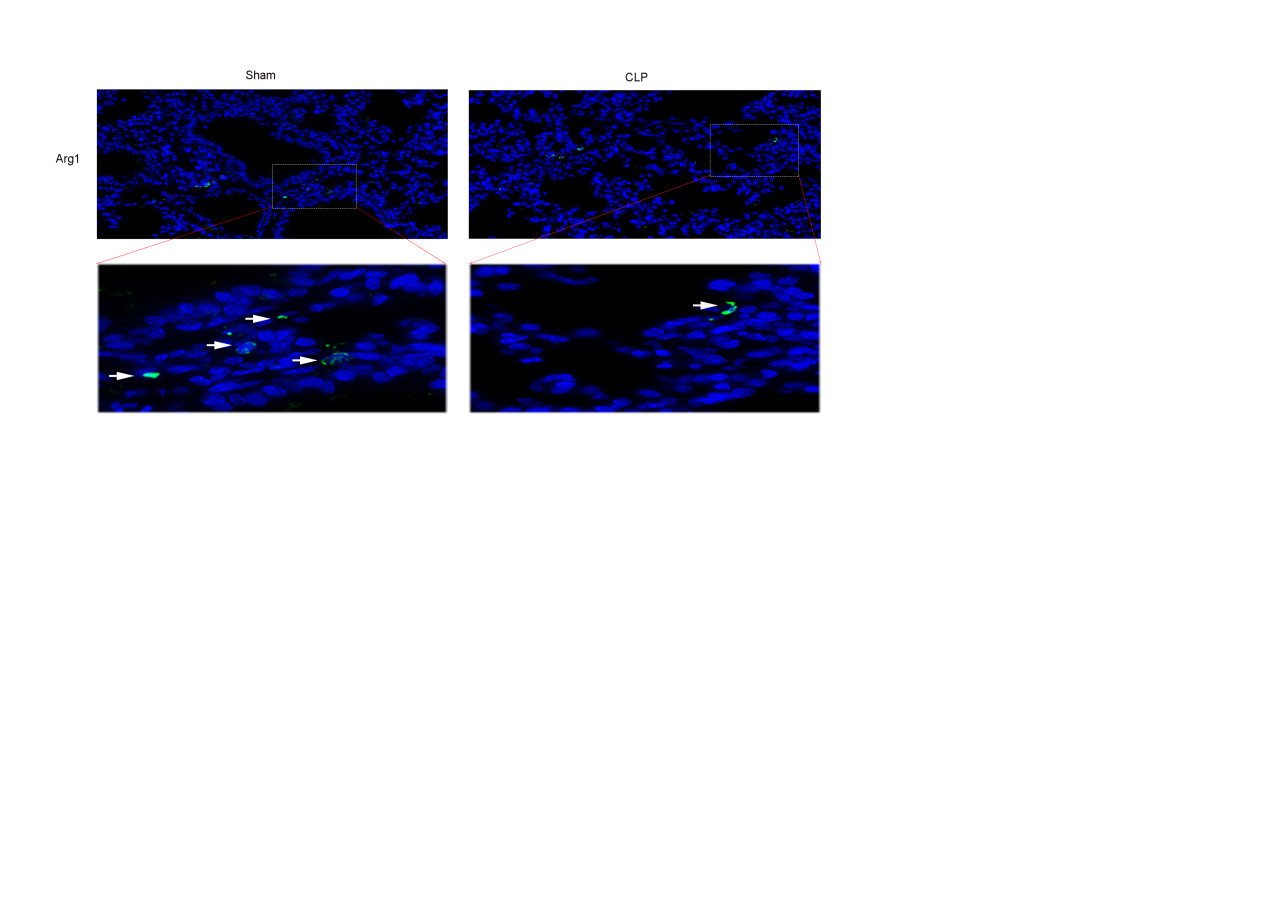


Figure S2. Intensity of immunofluorescence in lung tissues of M1 macrophages, (n =6 per group). iNOS (M1, green).


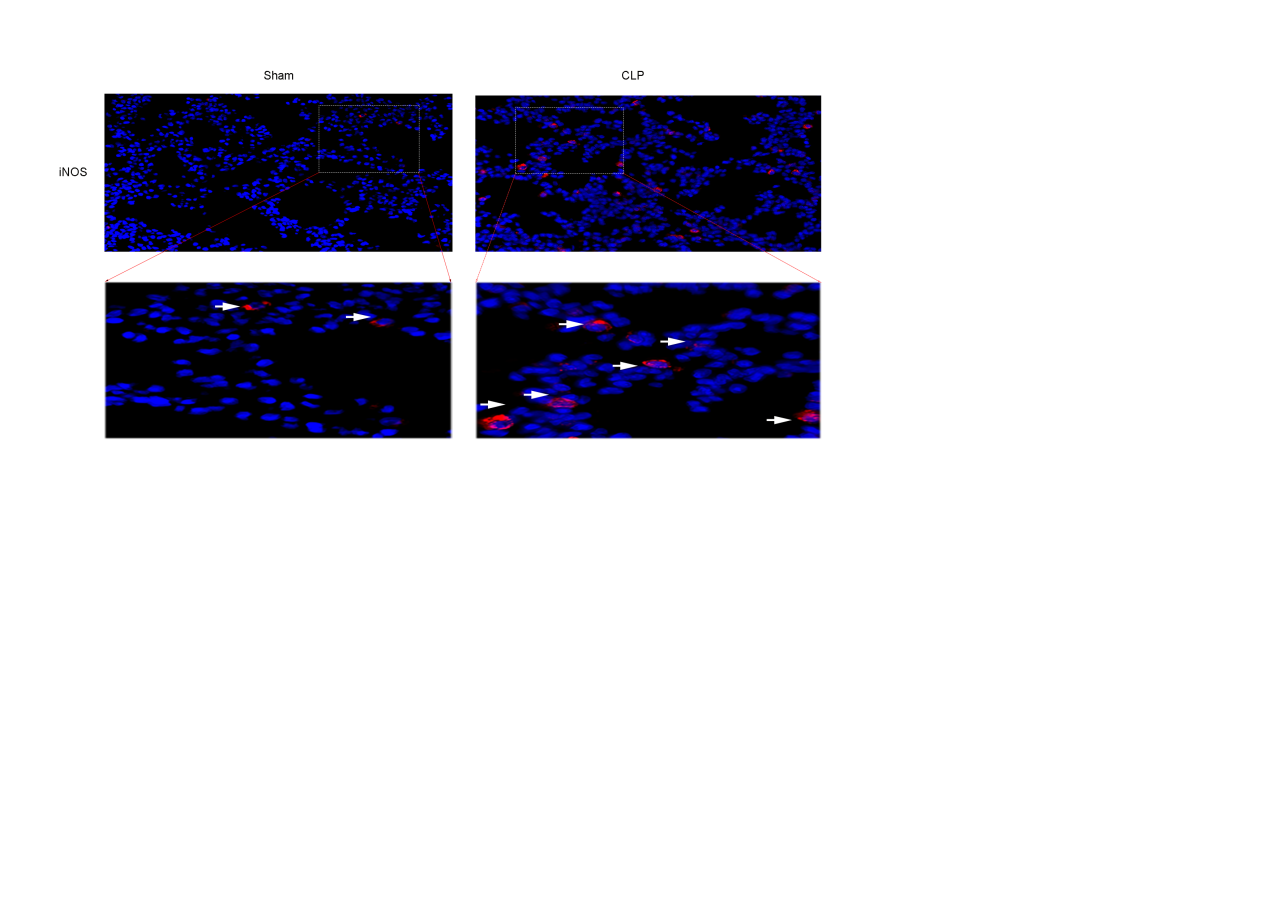


Figure S3. Intensity of immunofluorescence in lung tissues of M2 macrophages, (n =6 per group). Arg1 (M2, red).


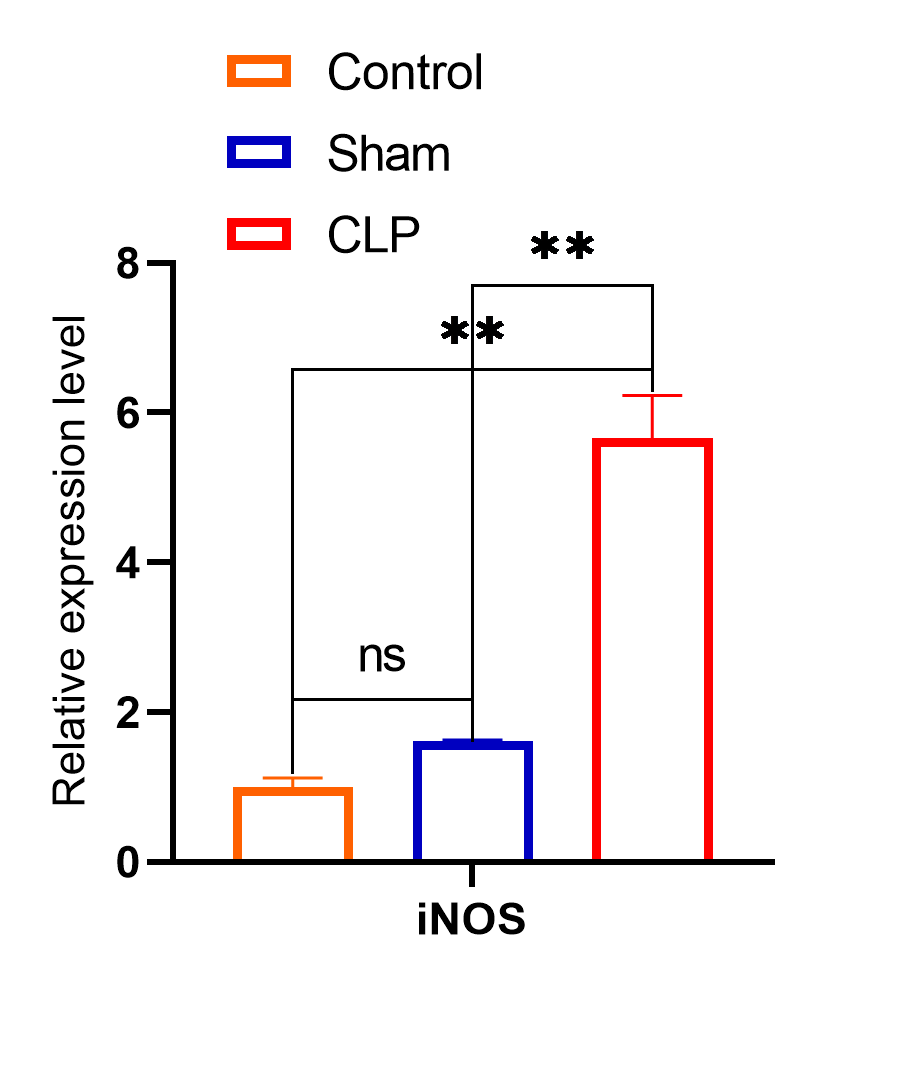


Figure S4.The expression of iNOS was measured using quantitative qpcr. **p*<0.05,***p*<0.01,ns *p*>0.05.


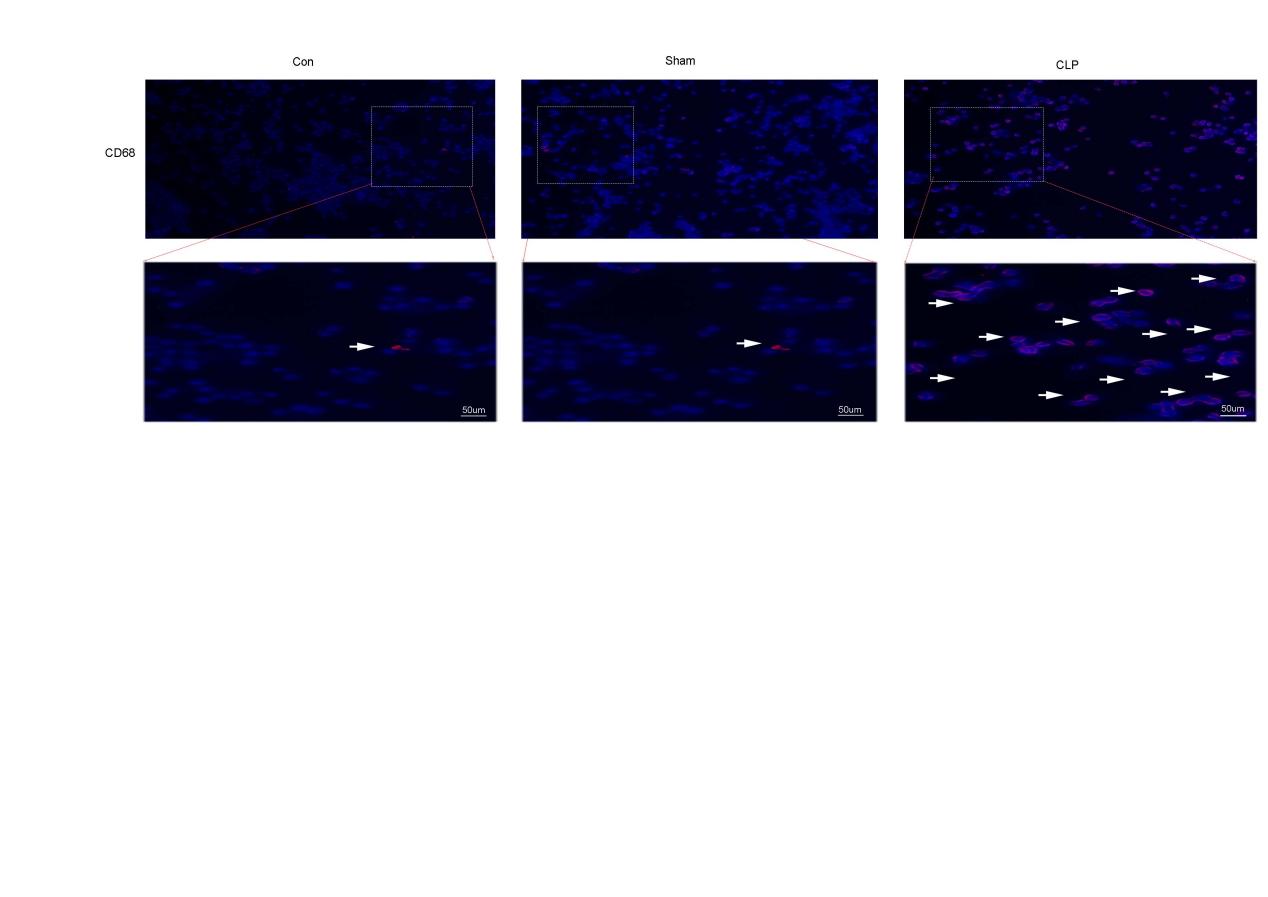


Figure S5 Co-incubation of extracellular vesicles with cells and lung tissue was performed. cells were stained with anti-cd68 antibody to identify the number of macrophages. cd68-positive macrophages were normalized to dapi-positive cells.


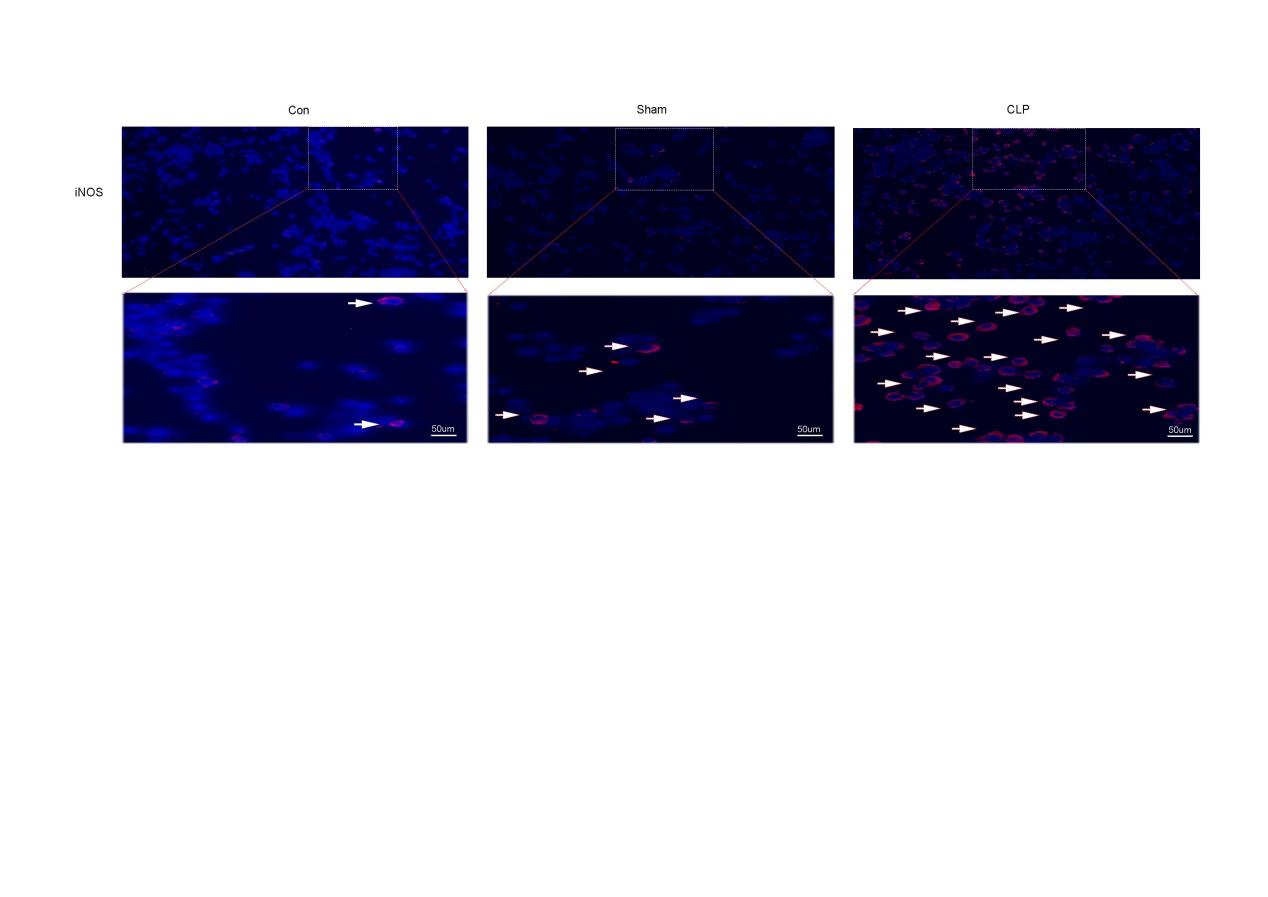


Figure S6 Immunofluorescence intensity of M1 macrophages.


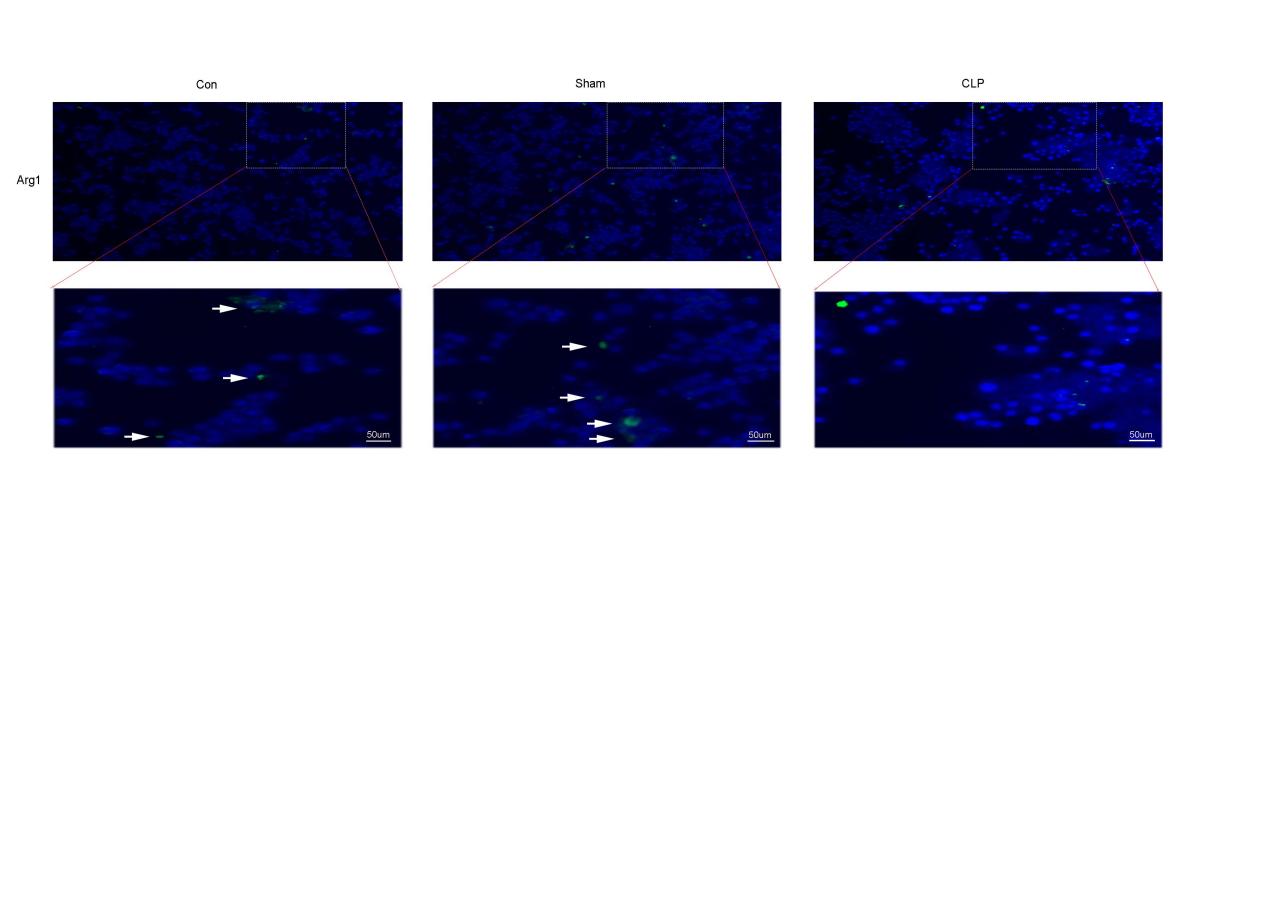


Figure S7 Immunofluorescence intensity of M2 macrophages.


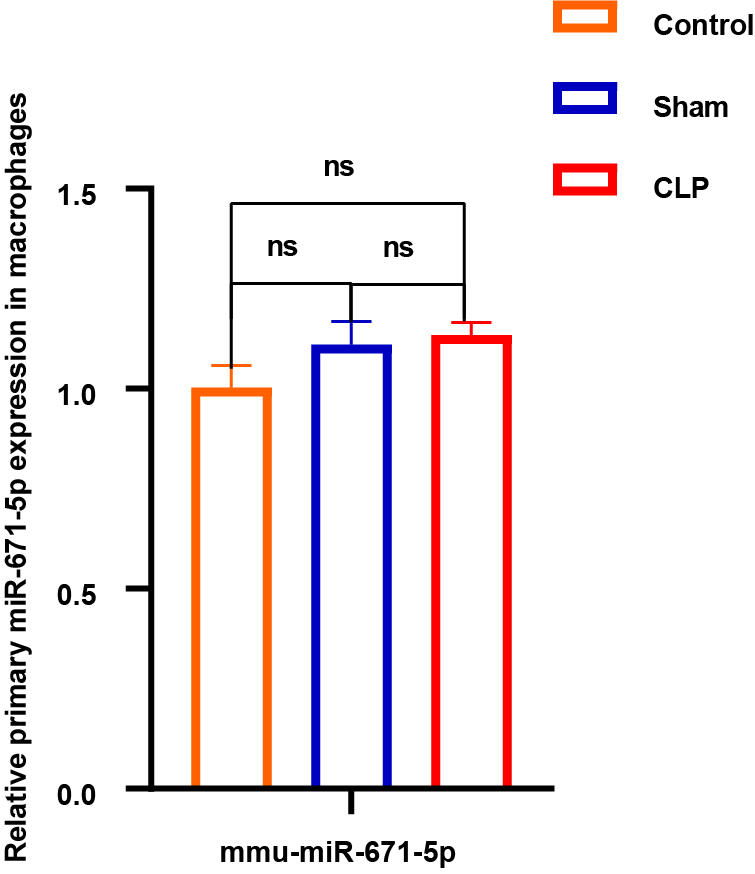


Figure S8 Expression level of pri-miR-671-5p in macrophages.**p*<0.05,***p*<0.01,ns *p*>0.05.


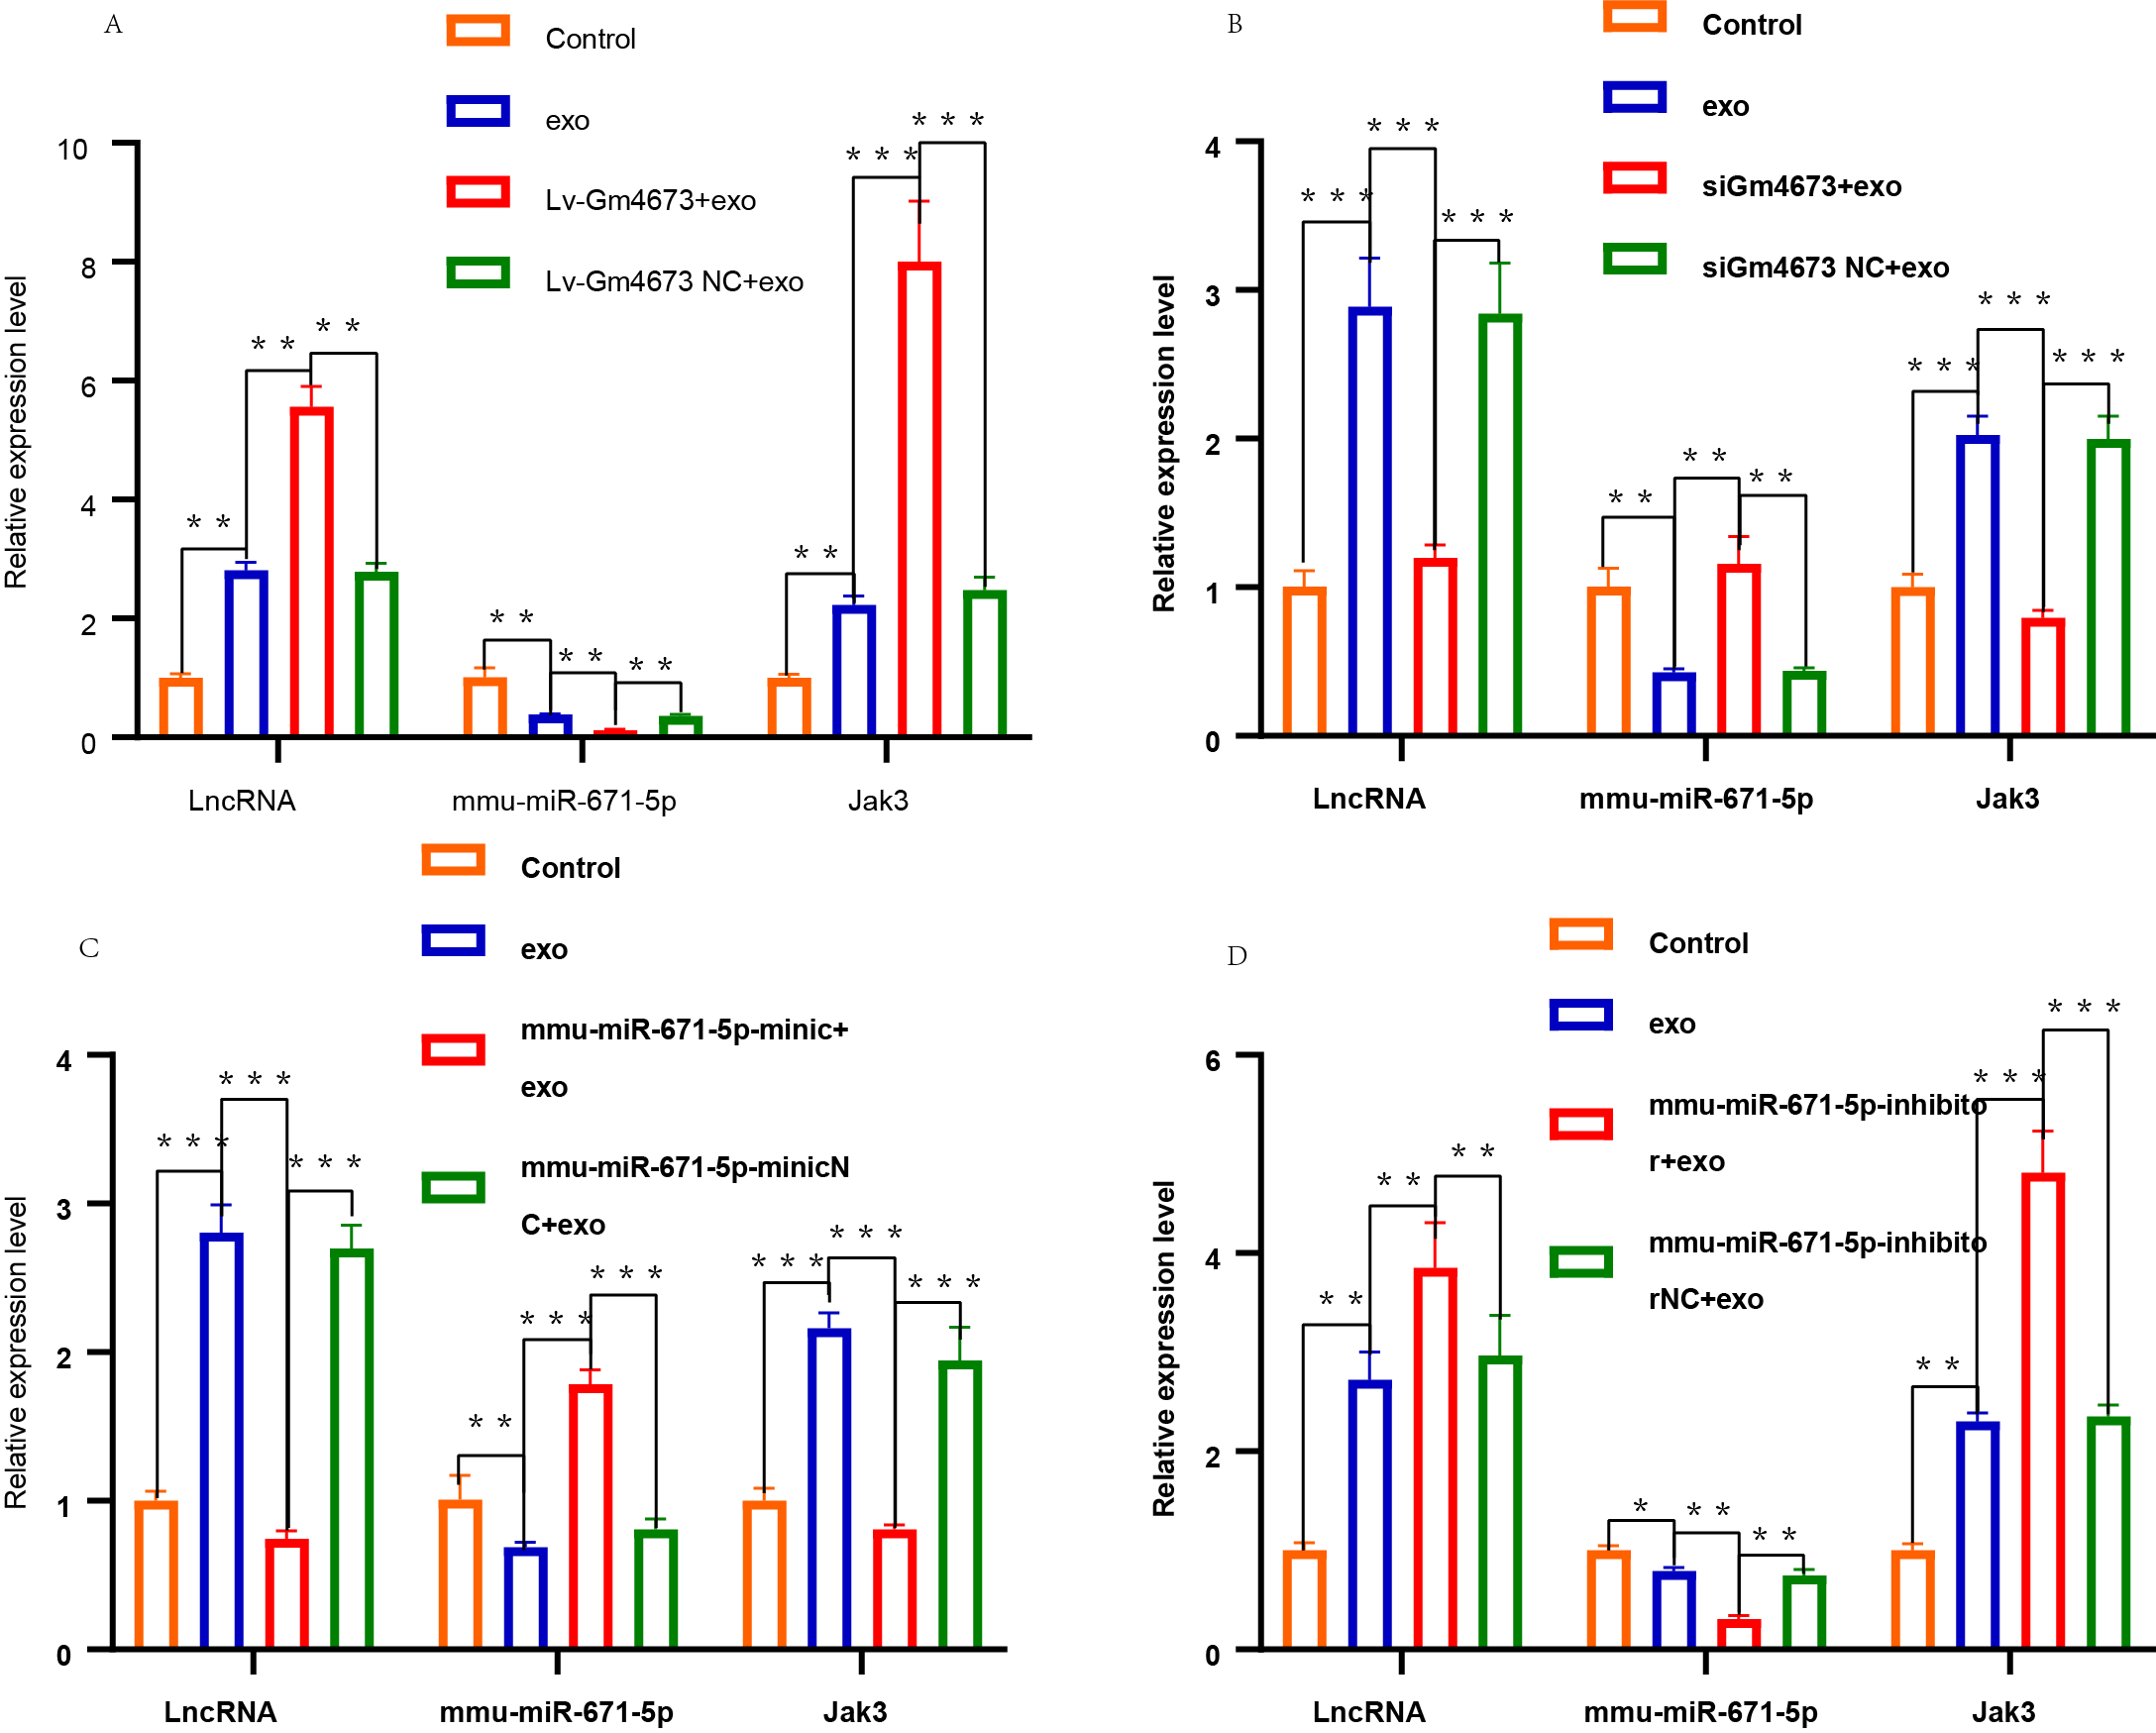


Figure S9 Regulatory relationship between Gm4673 and mmu-miR-671-5p in ceRNA.（A）Upregulation of Gm4673 in ceRNA, qPCR analysis of expression levels of Gm4673, mmu-miR-671-5p, and Jak3.（B）Downregulation of Gm4673 in ceRNA, qPCR analysis of expression levels of Gm4673, mmu-miR-671-5p, and Jak3.（C）Upregulation of mmu-miR-671-5p in ceRNA, qPCR analysis of expression levels of Gm4673, mmu-miR-671-5p, and Jak3.（D）Downregulation of mmu-miR-671-5p in ceRNA, qPCR analysis of expression levels of Gm4673, mmu-miR-671-5p, and Jak3.**p*<0.05,***p*<0.01,****p*<0.001, ns *p*>0.05.

Table S1. Primers used for qPCR

| Primers | Sequence (5′-3′) |
| --- | --- |
| IL-6 | F:GCTCTGGTCTTCTGGAGTTCC  R:GAGTTGGATGGTCTTGGTCCT |
| TNF-α | F:GGCAGCCTTGTCCCTTGAAGAG  R:GTAGCCCACGTCGTAGCAAACC |
| CD80 | F:AAACCTAGCACTACCCTGGC  R:AGCAAATGTGCAAATCGTCCC |
| CD206 | F:CGGAATTTCTGGGATTCAGCTTC  R:CTCTGTTCAGCTATTGGACGC |
| GAPDH | F:CAATGTGTCCGTCGTGGATCT  R:GTCCTCAGTGTAGCCCAAGATG |
| Gm4673 | F:CTCCCATCCACTTCACGCA  R:GCCCAACTCTGCTCCAAATG |
| MSTRG.41696 | F:CACACGCTCCTGAGGTTCACTAAC  R:GGAGTGTATGTGGCAGAGGTGTTAG |
| miR-671-5p | F:AATTGTACAGGAAGCCCTGGAGG  R:ATCCAGTGCAGGGTCCGAGG |
| miR-122-5p | F:AATCGGCGTGGAGTGTGACAAT  R:AATCGGCGTGGAGTGTGACAAT |
| Jak3 | F:CCGCCTACTGCTGTTCGCTTG  R:CCTCGCTCTCCACCAAGATGTTG |
| Rab20 | F:AGCAGTGGCGTTCCTTCAACATC  R:GCAGTACAGGGAGCCCAGACC |
